# Supplementary material for: Pharmacogenomics-Guided Pharmacotherapy in Patients with Major Depressive Disorder or Bipolar Disorder Affected by Treatment-Resistant Depressive Episodes: A Long-Term Follow-Up Study
Source: J Pers Med. 2022 Feb 19;12(2):316. doi: 10.3390/jpm12020316 (PMC8874425; doi:10.3390/jpm12020316)
Supplement: Supplementary file 1 [file jpm-12-00316-s001.zip › Suppl Table 18.02.2022.pdf]

## Supplementary Material

Tabel S1 Considered pharmacogenes and polymorphisms

| Gene           | Polymorphism                                                                                                                                                                       |
|----------------|------------------------------------------------------------------------------------------------------------------------------------------------------------------------------------|
| <i>5-HTT</i>   | 5HTT-LPR                                                                                                                                                                           |
| <i>ABCB1</i>   | rs1128503, rs1045642, rs4148738                                                                                                                                                    |
| <i>ABCC1</i>   | rs45511401                                                                                                                                                                         |
| <i>ABCC2</i>   | rs8187710, rs17222723, rs717620                                                                                                                                                    |
| <i>ABCG2</i>   | rs2231142                                                                                                                                                                          |
| <i>APOA1</i>   | rs1799837                                                                                                                                                                          |
| <i>APOB1</i>   | rs5742904                                                                                                                                                                          |
| <i>CAT</i>     | rs1001179                                                                                                                                                                          |
| <i>CES1</i>    | rs2244613, rs8192935                                                                                                                                                               |
| <i>CETP</i>    | rs1532624                                                                                                                                                                          |
| <i>COMT</i>    | rs4680, rs4633, rs4818                                                                                                                                                             |
| <i>CYBA</i>    | rs9932581, rs4673, rs1049255                                                                                                                                                       |
| <i>CYP1A1</i>  | rs1048943                                                                                                                                                                          |
| <i>CYP1A2</i>  | rs2069514, rs762551                                                                                                                                                                |
| <i>CYP2A6</i>  | rs28399433, rs1801272                                                                                                                                                              |
| <i>CYP2B6</i>  | rs2279343, rs3745274, rs3211371, rs28399499                                                                                                                                        |
| <i>CYP2C19</i> | rs6413438, rs12248560, rs4244285, rs4986893, rs28399504, rs56337013, rs72558186                                                                                                    |
| <i>CYP2C8</i>  | rs11572103, rs1058930, rs72558195                                                                                                                                                  |
| <i>CYP2C9</i>  | rs1799853, rs1057910                                                                                                                                                               |
| <i>CYP2D6</i>  | rs1065852, rs28371706, rs16947, rs61736512, rs1080985, rs35742686, rs3892097, rs28371725, rs5030655, rs5030867, rs5030656, rs72549351, rs72549354, Gene deletion, Gene duplication |
| <i>CYP3A4</i>  | rs2740574, rs35599367                                                                                                                                                              |
| <i>CYP3A5</i>  | rs776746                                                                                                                                                                           |
| <i>DRD2</i>    | rs1800497, rs1799732, rs1801028                                                                                                                                                    |
| <i>DRD3</i>    | rs6280                                                                                                                                                                             |
| <i>ENOS3</i>   | rs1799983, rs2070744                                                                                                                                                               |
| <i>EPHX1</i>   | rs2234922, rs1051740                                                                                                                                                               |
| <i>GPX1</i>    | rs1800668                                                                                                                                                                          |
| <i>GSTM1</i>   | Gene deletion                                                                                                                                                                      |
| <i>GSTP1</i>   | rs1695, rs1138272                                                                                                                                                                  |
| <i>GSTT1</i>   | Gene deletion                                                                                                                                                                      |
| <i>HMGR</i>    | rs3761740, rs5908                                                                                                                                                                  |
| <i>HTR2A</i>   | rs6314, rs7997012, rs6311                                                                                                                                                          |
| <i>HTR2C</i>   | rs6318                                                                                                                                                                             |
| <i>MPO</i>     | rs2333227                                                                                                                                                                          |
| <i>NAT1</i>    | rs5030839, rs56172717, rs56379106, rs4986782                                                                                                                                       |
| <i>NAT2</i>    | rs1801280, rs1799930, rs1799931                                                                                                                                                    |
| <i>NQO1</i>    | rs1800566, rs2917666                                                                                                                                                               |

|                |                                           |
|----------------|-------------------------------------------|
| <i>OGG1</i>    | rs1052133                                 |
| <i>OPRM1</i>   | rs1799971                                 |
| <i>PON1</i>    | rs705379, rs662                           |
| <i>SLC15A2</i> | rs2257212                                 |
| <i>SLCO1B1</i> | rs4363657, rs4149056                      |
| <i>SOD2</i>    | rs4880                                    |
| <i>TPMT</i>    | rs1800462, rs1800460, rs1142345           |
| <i>UGT1A1</i>  | rs8175347                                 |
| <i>UGT2B17</i> | Gene deletion                             |
| <i>VDR</i>     | rs1544410, rs731236, rs7975232, rs4516035 |
| <i>VKORC1</i>  | rs9923231, rs9934438                      |
